## 28 **Abstract**

29 Despite increasing interest in the role of reward in motor learning, the underlying mechanisms remain  
30 ill-defined. In particular, the relevance of explicit strategies to reward-based motor learning is unclear.  
31 To address this, we examined subject's (n=30) ability to learn to compensate for a gradually  
32 introduced 25<sup>0</sup> visuomotor rotation with only reward-based feedback (binary success/failure). Only  
33 two-thirds of subjects (n=20) were successful at the maximum angle. The remaining subjects initially  
34 follow the rotation but after a variable number of trials begin to reach at an insufficiently large angle  
35 and subsequently return to near baseline performance (n=10). Furthermore, those that were successful  
36 accomplished this largely via the use of strategies, evidenced by a large reduction in reach angle when  
37 asked to remove any strategy they employed. However, both groups display a small degree of  
38 remaining retention even after the removal of strategies. All subjects made greater and more variable  
39 changes in reach angle following incorrect (unrewarded) trials. However, subjects who failed to learn  
40 showed decreased sensitivity to errors, even in the initial period in which they followed the rotation, a  
41 pattern previously found in Parkinsonian patients. In a second experiment, the addition of a secondary  
42 mental rotation task completely abolished learning (n=10), whilst a control group replicated the  
43 results of the first experiment (n=10). These results emphasize a pivotal role of strategy-use during  
44 reinforcement-based motor learning and the susceptibility of this form of learning to disruption has  
45 important implications for its potential therapeutic benefits.

46

## 47 **Keywords**

48 Motor Learning, Reward, Strategies, Visuomotor Adaptation

49

50

51

52

53

54

## 55 **Introduction**

56 The motor system's ability to adapt to changes in the environment is essential for maintaining  
57 accurate movements (Tseng et al., 2007). Such adaptive behavior is thought to involve several distinct  
58 learning systems (Haith and Krakauer, 2013; Izawa and Shadmehr, 2011; Smith et al., 2006). For  
59 example, the two-state model proposed by Smith et al. (2006) has been able to explain a range of  
60 results in force-field adaptation paradigms in which a force is applied to perturb a reaching  
61 movement. The model states that learning is accomplished via both 'fast' and 'slow' processes, the  
62 'fast' process learns rapidly but has poor retention, whereas the 'slow' process learns more slowly but  
63 retains this information over a longer timescale. Subsequently using a visuomotor rotation paradigm,  
64 in which the visible direction of a cursor is rotated from the actual direction of hand movement, it has  
65 been suggested that the 'fast' process resembles explicit re-aiming whereas the 'slow' process is  
66 implicit (McDougle et al., 2015). The implicit aspect may be composed of several different processes  
67 (McDougle et al., 2015), the first and most widely researched being cerebellar adaptation (Izawa et  
68 al., 2012). However, additional processes such as use-dependent plasticity and reinforcement of  
69 actions that lead to task success are required to fully explain experimental findings (Huang et al.,  
70 2014). Haith and Krakauer (2013) have proposed a scheme based on these four processes that  
71 attempts a synthesis between the principles of motor learning and the distinction between model-  
72 based and model-free mechanisms proposed for reinforcement learning and decision-making (Doll et  
73 al., 2016).

74  
75 The addition of rewarding feedback has proven beneficial in increasing retention of adaptation (Galea  
76 et al., 2015; Shmuelof et al., 2012; Therrien et al., 2016) and motor skills (Abe et al., 2011; Dayan et  
77 al., 2014). Findings such as these have generated interest in the possibility that the addition of reward  
78 to rehabilitation regimes may improve the length of time that adaptations are maintained after training  
79 (Quattrocchi et al., 2017; Shmuelof et al., 2012). However, it is still unclear which of the multiple  
80 systems mediating motor learning reward may be acting on. Motor learning via purely reward based  
81 feedback is also possible and has been applied in two separate forms: binary and graded. Graded point

82 based reward is often based on the distance of the reaching movement from the target and provides  
83 information about the magnitude but not the direction of the error (Manley et al., 2014; Nikooyan and  
84 Ahmed, 2015). Graded feedback has proved sufficient for learning abrupt rotations (Nikooyan and  
85 Ahmed, 2015), however, in certain conditions explicit awareness is required for successful learning  
86 (Manley et al., 2014). An alternative method is to only provide binary feedback in which the reward  
87 signals task success, such as hitting a target (Izawa and Shadmehr, 2011; Pekny et al., 2015; Therrien  
88 et al., 2016). In contrast to graded feedback, only gradually introduced perturbations have successfully  
89 been learnt via binary feedback alone (van der Kooij and Overvliet, 2016) and the role of explicit  
90 awareness has yet to be examined.

91

92 In classical visuomotor adaptation, in which full visual feedback of the cursor is available, gradual  
93 adaptation is considered to be largely implicit (Galea et al., 2010). However, this may not be the case  
94 when only end-point feedback is provided (Saijo and Gomi, 2010). The question remains as to  
95 whether learning a gradually introduced visuomotor rotation based on binary feedback also mainly  
96 involves implicit processes. Various methods (Huberdeau et al., 2015) have been used to separate the  
97 implicit and explicit components of learning such as asking subjects to verbally report aiming  
98 directions (McDougle et al., 2015; Taylor et al., 2014) and forcing subjects to move at reduced  
99 reaction times (Haith et al., 2015; Leow et al., 2017). In the current paradigm, we assessed the  
100 contribution of strategies at the end of the learning period by removing all feedback but asking  
101 subjects to maintain their performance. Subsequently, we asked subjects to remove any strategy they  
102 may have been using. Such an approach has previously been used to measure the relative implicit and  
103 explicit components of adaptation to different sizes of visuomotor rotations (Werner et al., 2015).

104

105 Our second approach to investigating the explicit contribution to learning based on binary feedback  
106 was the introduction of a dual task in order to divide cognitive load and suppress the use of strategies.  
107 Dual task designs have previously successfully been employed to disrupt explicit processes in  
108 adaptation (Galea et al., 2010; Taylor and Thoroughman, 2007, 2008), sequence learning (Brown and  
109 Robertson, 2007) and motor skill learning (Liao and Masters, 2001). Various forms of dual task have

110 been used such as counting auditory stimuli (Maxwell et al., 2001), repeating an auditory stimulus  
111 (Galea et al., 2010) or recalling words from a memorized list (Keisler and Shadmehr, 2010). We  
112 selected a mental rotation task based on using an electronic library of three-dimensional shapes  
113 (Peters and Battista, 2008; Shepard and Metzler, 1971). This particular task was selected in order to  
114 maximize the likelihood of interfering with the explicit re-aiming process. Indeed, it has previously  
115 been shown that both spatial working memory and mental rotation ability correlate with performance  
116 in the early ‘fast’ phase of adaptation (Anguera et al., 2009; Christou et al., 2016). Furthermore, the  
117 same prefrontal regions are activated during the early phase of adaptation and during the performance  
118 of a mental rotation task (Anguera et al., 2009). It has also been suggested that the explicit process of  
119 re-aiming in response to visuomotor rotations may involve a mental rotation of the required  
120 movement direction (Georgopoulos and Massey, 1987)

121

122 If the learning of a gradually introduced rotation via binary feedback is dominated by explicit  
123 processes, this should be evidenced by a large change in performance when subjects are asked to  
124 remove any strategy. Furthermore, the dual task should severely disrupt learning and could possibly  
125 unmask any implicit process.

126

## 127 **Materials and Methods**

### 128 *Subjects*

129 Sixty healthy volunteers aged between 18 and 35 participated in the study. Forty subjects (thirty-seven  
130 females, mean age = 19.9 years) completed experiment 1 and twenty (fifteen females, mean age =  
131 21.6 years) in experiment 2. All subjects were right-handed with no history of neurological or motor  
132 impairment and had normal or corrected-normal vision. Volunteers were recruited from the  
133 undergraduate pool in the School of Psychology and wider student population at the University of  
134 Birmingham and all gave written informed consent. Subjects were remunerated with their choice of  
135 either course credits or money (£7.50/hour). The study was approved by the local ethics committee of  
136 the University of Birmingham and performed in accordance with those guidelines.

137

### 138 *Experimental Protocol*

139 A similar paradigm has previously been employed and the current protocol was designed to replicate  
140 this as closely as possible (Therrien et al., 2016). In addition to the rotation of 15°, we extended this  
141 paradigm to a 25° rotation. Subjects performed reaching movements with their right arm using a  
142 KINARM (B-KIN Technologies), Figure 1A. Subjects were seated in front of a horizontally placed  
143 mirror that reflected the visual stimuli presented on a screen above (60 Hz refresh rate). Reaching  
144 movements were performed in the horizontal plane whilst subjects held the handle of a robotic  
145 manipulandum, with the arm hidden from view by the mirror.

146

### 147 *Experiment 1*

148 Two different paradigms were employed in Experiment 1, both consisted of a gradually introduced  
149 rotation of the required angle of reach for a trial to be considered successful. The maximal extent of  
150 the rotation was either 15° (n=10) or 25° (n=30). Subjects were required to learn the rotation on the  
151 basis of only binary feedback indicating if they had successfully hit the target region. After the  
152 rotation had reached the maximal extent, all feedback was extinguished and two further blocks of  
153 trials were performed to assay the level of retention and to what extent this was explicit in nature.

154

155 A total of 670 or 470 trials were performed for the 25° and 15° paradigms, respectively. Each trial  
156 followed an identical sequence. Initially a starting position was displayed on screen (red colored  
157 circle, 1cm radius), after subjects had moved the position of the cursor (white circle, 0.5cm radius)  
158 into the starting position, the starting position changed color from red to green. After a small delay  
159 (randomly generated, 500-700ms), in which subjects had to maintain the position of the cursor within  
160 the starting circle, a target (red circle, 1cm radius) appeared directly in front of the starting circle at a  
161 distance of 10cm. Subjects were instructed to make rapid ‘shooting’ movements that intercepted a  
162 visual target, they were instructed that they did not have to attempt to terminate their movement in the  
163 target but pass directly through it (Figure 1B). If the cursor intercepted a ‘reward region’ ( $\pm 5.67^\circ$ ),  
164 initially centered on the visible target, the movement was considered successful and the target

165 changed color from red to green and a large (8x8cm) green ‘tick’ was displayed at a distance of 20cm  
166 directly in front of the starting position (Figure 1C). However, if the cursor did not intercept the  
167 reward region the trial was considered unsuccessful and the visible target disappeared from view.  
168 Movement times, defined as the time from leaving the starting circle to reaching a radial distance of  
169 10cm, were constrained to a range of 200-1000ms. Movements outside of this range but at the correct  
170 angle were counted as incorrect trials and no tick was displayed. As a visual cue, movements outside  
171 of the acceptable duration were signaled with a change of the target color, blue for too slow and  
172 yellow for too fast. After the completion of a reaching movement the robot returned the handle to the  
173 start position and subjects were instructed to passively allow this whilst maintaining their grip on the  
174 handle. Reaction times, defined as the difference in time between the appearance of the target and the  
175 time at which the cursor left the starting circle, were limited to a maximum 600ms. If a movement  
176 was not initiated before this time the target disappeared and the next trial began after a small delay  
177 and these trials were excluded from further analysis.

178  
179 After an initial period of ten trials, in which the cursor position was constantly visible, for the  
180 remainder of the experiment it was extinguished. The only feedback subjects received was a binary  
181 (success/fail) signal indicating if the angle of reach was correct, in the form of a change of target color  
182 and the appearance of the tick. For an initial period of forty trials the reward region remained centered  
183 on the position of the visual target, after this it was shifted in steps of 1° every twenty trials. This  
184 manipulation ensured that for a reaching movement to be considered correct it must be made at an  
185 increasingly rotated angle from the visual target (Figure 1C). Subjects were pseudo-randomly  
186 assigned to groups that received either a clockwise or counter-clockwise rotation. Once the reward  
187 region had reached the maximal angle, either 15° or 25°, it was held constant for an additional twenty  
188 trials. Subsequently, subjects were informed that they would no longer receive any feedback about  
189 their performance but that they should continue to perform in the same manner as before, this  
190 ‘Maintain’ block consisted of fifty trials. Following this, subjects were asked a series of simple  
191 questions to assay their awareness of the rotation, answers were noted by the experimenter.  
192 Subsequently all subjects were told ‘During the task we secretly moved the position of the target that

193 you had to hit. You will still not receive information on whether you hit the target or not but please try  
194 to move as you did at the start of the experiment'. Crucially subjects were not informed of the  
195 direction or magnitude of the rotation they had experienced. The final 'Remove' block consisted of  
196 fifty trials. The position of the handle throughout the task was recorded at a sampling rate of 1 kHz  
197 and saved for offline analysis.

198

199

200

201

202

203

204

205

206

207

208

209

210



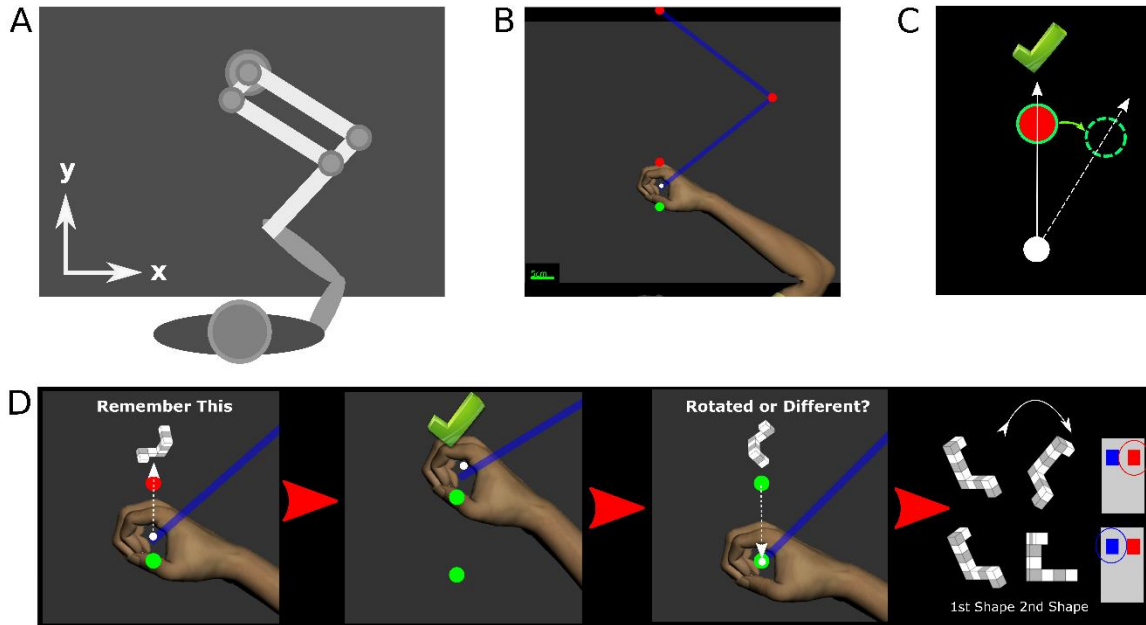

211

212 **Figure 1. Experimental design.** *A*, Subjects held the handle of robotic manipulandum with their right

213 hand, the position of the arm and handle was hidden from sight and feedback was provided on a

214 horizontal screen. **B**, Subjects made 'shooting' movements from a starting position (green circle)

215 towards a target (red circle), after the initial practice trials the position of the cursor (white circle)

216 was no longer visible at any point. **C**, Successful trials were indicated to the subject with the display

217 of a green tick after the cursor had passed through a region centered on the target, over the course of

218 the paradigm the position of the reward region gradually moved (solid green circle to dashed green

219 circle) whilst the visible target (red circle) remained in the central location. By the end of the learning

220 period a successful reach (dotted white line) was rotated by a maximum of either 15° or 25°. **D**, Time-

221 course of Experiment 2, at the same time as the target appeared on screen a 'shape' was also

222 displayed slightly above it, the subject was asked to memorize this shape. After the reach was

223 completed and the hand returned to the starting position subjects used their left hand to respond with

224 a button press as to whether they believed the new shape shown on screen was a rotated version of the

225 shape or an entirely different shape.

226

227

228

## 229 *Experiment 2*

230 Experiment 2 comprised of the same reaching task as Experiment 1 but with the addition of a mental  
231 rotation dual task. The dual task required subjects to hold a three-dimensional shape in working  
232 memory for the duration of the reaching movement (Figure 1D). Subjects had to respond with a  
233 button press using their left hand to indicate if a shape displayed at the end of the reaching movement  
234 was a rotated version of a shape displayed at the time of target presentation or a different shape.

235

236 Shapes had the form of a series of connected cubes, alternately colored grey and white, they were  
237 selected from an electronic library designed on the basis of the Shepard and Metzler type stimuli  
238 (Peters and Battista, 2008; Shepard and Metzler, 1971). All rotations were performed within the plane  
239 of the screen, i.e. although the stimuli represented three-dimensional shapes all rotations were in two-  
240 dimensions. A subset of 26 shapes were selected from the library for use in this experiment and are  
241 available on <https://osf.io/vwr7c/>. The trial protocol was the same as that employed in Experiment 1  
242 but at the time when the target circle appeared, a randomly selected shape from the subset was  
243 displayed in an 8x8cm region at a position 20cm away from the starting position. Subjects were  
244 instructed to commit this shape to memory. The shape remained visible on screen until the end of the  
245 reaching movement, the point at which the radial amplitude of the cursor exceeded 10cm. The shape  
246 was then extinguished and the same binary feedback as employed in Experiment 1 was displayed.  
247 After the robot had guided the handle back to the starting position a second shape was displayed. In  
248 half of the trials this was an identical shape to the first one but had undergone a rotation selected at  
249 random from a uniform distribution of 0-360°, in the other half of trials it was a different shape  
250 selected at random from the library. The order of trials in which the shape was either rotated or  
251 different was randomized and subjects had a maximum of 2s to respond. Subjects in the Dual Task  
252 group (n=10) were instructed to press the right-sided button of two buttons on a button box held in  
253 their left hand if they believed the second shape to be a rotated version of the first one and the left-  
254 sided button if they believed it was a different shape. Importantly subjects were given no feedback on  
255 their performance in the dual task but were informed prior to the experiment that this would be  
256 monitored, the responses were recorded and analyzed offline. This design was selected in order to

257 avoid any interfering effects of rewarding feedback from the dual task with the binary feedback in the  
258 reaching task. As a control, another group of subjects received identical visual stimuli but were  
259 instructed to press a random button of the two on each trial. Subjects were pseudo-randomly assigned  
260 to either the Control or Dual Task groups.

261

262 For Experiment 2 the familiarization period at the start of the experiment, in which the position of the  
263 cursor was visible, was extended to twenty trials in order for subjects to have sufficient time to  
264 acclimatize to the additional timing requirements of the button press. The paradigm subsequently  
265 followed that of Experiment 1 with a maximal angle of rotation of 25°.

266

### 267 *Data Analysis*

268 All data analysis was performed with custom written routines in MATLAB (The Mathworks) and  
269 extracted data and all code required to reproduce the analysis and figures in this paper are freely  
270 available on (<https://osf.io/vwr7c/>).

271

272 The end point angle of each reaching movement was calculated either at the time that the cursor  
273 intercepted the reward region or in the case of incorrect trials when the cursor reached a radial  
274 amplitude of 10cm. An angle of zero degrees was defined as a movement directly ahead, i.e. toward  
275 the visible target position. A positive angle of rotation was defined as a clockwise shift of the reward  
276 region, and reach angles and target positions for the counter-clockwise rotation were sign-transformed  
277 to positive values for comparability. The ‘Baseline’ period was defined as the first forty trials without  
278 visual feedback of the cursor, during which the reward region was centered on the visual target.  
279 Subjects were considered to have successfully learnt the rotation if the mean end point angle of the  
280 reaching movements fell within the reward region during the last twenty trials before the ‘Maintain’  
281 period, a time at which the rotation was held constant at its maximal value.

282

283 During the retention phase of the experiment (last one hundred trials), we calculated the amount of  
284 retention that could be accounted for by explicit and implicit processes. A subject’s implicit retention

285 was defined as the difference between the mean reach angle in the final fifty trials ('Remove' blocks),  
286 after subjects had been instructed to remove any strategy they had been using, and mean reach angle  
287 during the 'Baseline' blocks. A subject's explicit retention was defined as the difference between the  
288 mean reach angle during the 'Maintain' blocks, the first fifty trials after removal of binary feedback in  
289 which subjects were instructed to continue reaching as before, and the implicit retention.

290

291 In order to analyze the effect of reward on subjects behavior we conducted trial-by-trial analysis in a  
292 manner similar to one that has previously been employed for analysis of reaching performance in  
293 response to binary feedback (Pekny et al., 2015). The change in reach angle following trial  $n$ ,  $\Delta u^{(n)}$ ,  
294 was defined as the difference between consecutive trials:

295

$$296 \quad \Delta u^{(n)} = u^{(n+1)} - u^n$$

297

298 Subsequently we examined the distributions of  $\Delta u$  following only rewarded (correct) or unrewarded  
299 (wrong) trials. The resulting distributions of  $\Delta u$  were non-normal and therefore we analyzed and  
300 report the median and median absolute deviation (MAD) of each subject's distributions. We also  
301 examined the absolute change in reach angle  $|\Delta u|$ , i.e. the magnitude of change regardless of  
302 direction.

303

304 In order to investigate the effects of a reward history spanning multiple trials we examined the  $|\Delta u|$   
305 following all possible combinations of success in the previous three trials. We first searched each  
306 subject's responses for the occurrence of all eight possible sequences of reward and calculated the  
307 mean change in reach angle following each. We then quantified this behavior using a state-space  
308 model in which  $|\Delta u|$  was a function of the outcome of the previous three trials as well as variability ( $\varepsilon$   
309 ) that could not be accounted for by the recent outcomes (Pekny et al., 2015):

310

$$311 \quad |u(n)| = \alpha_0(1 - R(n)) + \alpha_1(1 - R(n - 1)) + \alpha_2(1 - R(n - 2)) + \varepsilon$$

312

313 In the above equation  $R$  represents the presence of reward on a given trial with a value of 1 for a  
314 correct trial,  $R(n)$  therefore represents the presence of reward on the previous trial with  $R(n - 1)$  and  
315  $R(n - 2)$  the preceding two trials. The components  $\alpha_0$ ,  $\alpha_1$  and  $\alpha_2$  represent the sensitivity to the  
316 outcomes of these trials with higher values indicating subjects made larger changes in response to the  
317 outcome of that trial.

318

319 The verbal responses to the questions asked before the start of the 'Remove' block was noted down by  
320 the experimenter and analyzed offline. A subject's awareness of the perturbation and efforts to  
321 deliberately counter it were rated on a scale of 0, 0.5 and 1, with 0 indicating no awareness and 1 full  
322 awareness.

323

#### 324 *Statistical Analysis*

325 Statistical analysis was performed in MATLAB. In order to test for initial effects mixed design  
326 ANOVAs were used, with Group (25RotSucces, 25RotFail etc.) as the between-subjects factor and  
327 time-point (Baseline, 15° Block, Maintain etc.) or MeasuredVariable (Median  $\Delta u$ , Reward  
328 Component etc.) as the within-subjects factor. The Greenhouse-Geiser correction was applied in cases  
329 of violation of sphericity and corrected p-values and degrees of freedom are reported in the text. In  
330 cases in which a significant interaction was found in the ANOVA, post-hoc tests were performed to  
331 test for differences between groups at each TimePoint or MeasuredVariable. As data was often found  
332 to be non-normally distributed using Kolmogorov-Smirnov tests, the non-parametric Kruskal-Wallis  
333 test was applied throughout. In cases of a significant effect of group on an individual outcome  
334 measure, further pairwise comparisons of mean group ranks were employed and Bonferroni corrected  
335 p-values are reported in the text. For tests of a difference of a single group from zero, such as in  
336 testing for implicit learning, Wilcoxon-Signed Rank tests were employed and Bonferroni corrected p-  
337 values are reported in the text. A critical significance level of  $\alpha=0.05$  was used to determine statistical  
338 significance.

339

## 340 **Results**

341

### 342 *Experiment 1: Successfully learning to compensate for a 25° rotation includes a large explicit* 343 *component*

344 We first sought to investigate the size of a gradual introduced visuomotor rotation that subjects can  
345 learn based on binary feedback. All subjects who experienced the 15° rotation (15Rot group) learnt to  
346 fully compensate (Figure 2A). Successful compensation was defined as having a mean reach angle  
347 within the reward region in the final twenty trials before the retention phase. However, for the 25°  
348 group (25Rot, magenta group, Figure 2B), the average reach direction fell outside the reward region,  
349 indicating incomplete learning. Underlying the mean performance was a split in behavior: some  
350 subjects successfully learnt the full rotation, whereas one third of subjects did not. On the basis of this  
351 behavior, they were categorized into two subgroups: 25RotSuccess (red group, N=20) and 25RotFail  
352 (blue group, N=10), respectively.

353

354 Next, we compared reach angle for the three groups (15Rot, 25RotSuccess and 25RotFail) at specific  
355 time points in order to gain an understanding at which stage the difference emerged (Figure 2C, D).  
356 Despite no difference between groups at baseline ( $H(2) = 4.03$ ,  $p = 0.13$ , Kruskal Wallis), a difference  
357 had emerged at 15 degrees ( $H(2) = 9.63$ ,  $p = 0.008$ ; Figure 2C). Specifically, reach angle for the  
358 25RotFail group was lower than both the 15Rot ( $p = 0.022$ ) and the 25RotSuccess groups ( $p = 0.014$ ).  
359 During the ‘Maintain’ phase, when binary feedback had been removed but subjects were instructed to  
360 continue reaching as before, there was a significant effect of group ( $H(2) = 20.08$ ,  $p < 0.001$ ; Figure  
361 2B, C). Unsurprisingly, the 25RotSuccess group was greater than the 15Rot ( $p = 0.002$ ) and the  
362 25RotFail groups ( $p < 0.001$ ). Crucially, after subjects were instructed to remove any strategy and  
363 reach as they did at the beginning of the experiment, there was no difference between the groups  
364 ( $H(2) = 0.78$ ,  $p = 0.68$ ; Figure 2B, C). Analysis of the reach angles during the paradigm revealed that  
365 even at a rotation of 15° there was divergence between the 25RotFail and 25RotSuccess groups.

366 Furthermore, the instruction to remove any strategy resulted in a return to a similar level of  
367 performance across all three groups.

368

369 We probed the nature of learning by calculating the implicit and explicit components of retention  
370 (Figure 2D). Implicit retention reflected the retention after removal of any strategies, whereas Explicit  
371 retention represented the change in behavior accounted for by the use of strategies. The Explicit  
372 component of the 25RotSuccess group was greater than both 15Rot ( $p = 0.006$ ) and 25RotFail ( $p =$   
373  $0.006$ ). Furthermore, only the 25RotSuccess ( $Z = 210$ ,  $p < 0.001$ ) group had a significant Explicit  
374 component to their retention. Whilst there was no effect of Group on the Implicit component ( $H(2) =$   
375  $1.84$ ,  $p = 0.40$ ), both groups in the  $25^\circ$  paradigm showed a significant difference from 0  
376 (25RotSuccess,  $Z = 193$ ,  $p = 0.001$ ; 25RotFail,  $Z = 48$ ,  $p = 0.014$ ), however, the 15Rot group was no  
377 longer significant after correction for multiple comparisons ( $Z = 48$ , uncorrected  $p = 0.037$ , corrected  
378  $p = 0.111$ ). Therefore, whilst all three groups showed a similar small level of implicit retention, only  
379 the subjects who successfully learnt the  $25^\circ$  rotation showed evidence for explicit learning.

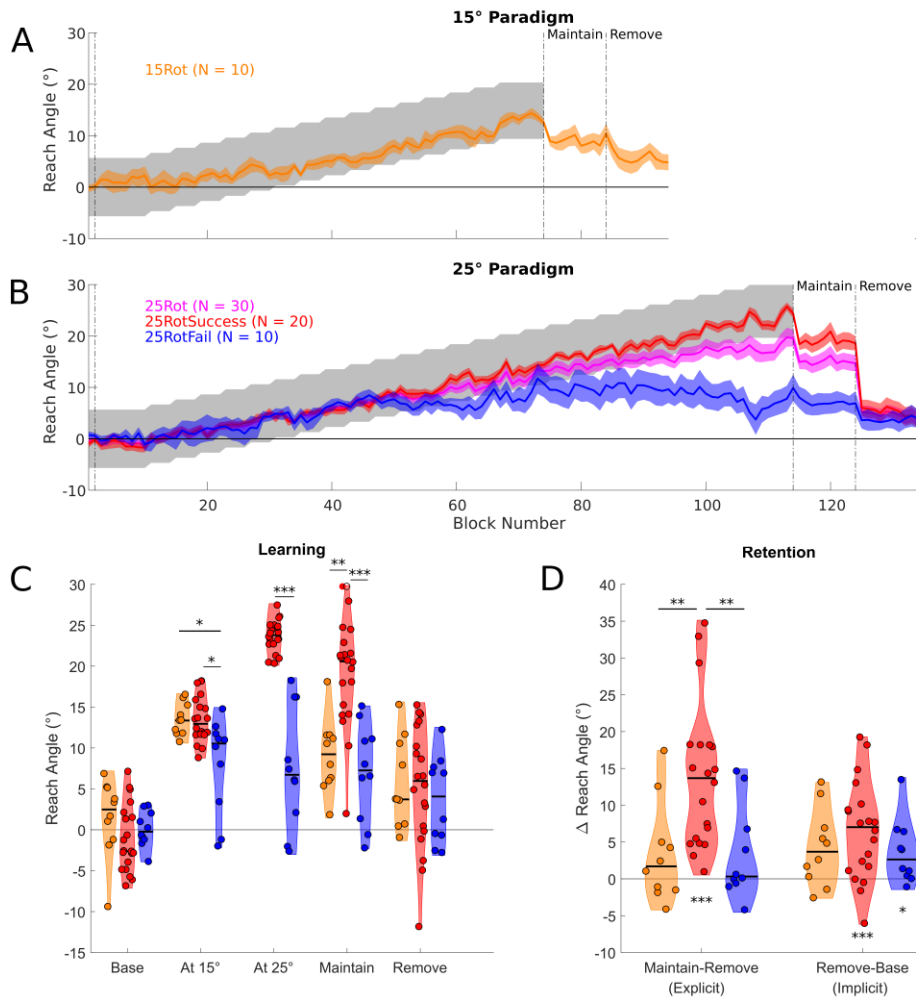

380

381 **Figure 2. Experiment 1: group performance.** *A*, Reach angle averaged over blocks of 5 trials, solid  
 382 colored lines represent the mean of each group and the shaded region represents SEM. The average  
 383 behavior of subjects in the 15Rot paradigm (Orange) fell consistently within the rewarded region  
 384 (grey shaded region) indicating successful learning. *B*, Average reach angle over blocks for all  
 385 subjects in the 25Rot paradigm (magenta) and also the same subjects split into two groups based on  
 386 success at the final angle (25RotSuccess – red, 25RotFail – blue). *C*, Distribution plots displaying the  
 387 reach angles for subjects in the three groups at various timepoints throughout the experiment with  
 388 individual data points overlaid on an estimate of the distribution. Horizontal black line in the  
 389 distribution represents the group median. *D*, Distribution plots of the computed variables of Implicit  
 390 (‘Remove-Baseline’) and Explicit (‘Maintain-Implicit’) retention. Significance stars above horizontal  
 391 black bars indicate differences between the groups (\*  $P < 0.05$ , \*\*  $P < 0.01$ , \*\*\*  $P < 0.001$ ).  
 392 Significance stars below the distributions represent a significant difference from zero.



393 In order to understand the mechanism of learning, and how this might differ between the  
394 25RotSuccess and 25RotFail groups, we examined trial-by-trial behavior. Two distinct types of  
395 behavior were apparent (Figure 3). Behavior in those that failed (Figure 3B) was initially similar to  
396 successful subjects (Figure 3A) but at some point subjects began to fail to reach at a sufficient angle.  
397 Subsequently the angle of reach returned to near zero, despite a continued lack of reward. The angles  
398 at which subjects in the 25RotFail group failed varied (mean=13.0°), but all displayed the same  
399 pattern of return to baseline (Figure 3C). Given the apparently similar behavior in the initial learning  
400 stage, it is important to know whether there are differences even at this early stage. To this end, we  
401 only included trials in the initial successful period for the 25RotFail group in all subsequent analysis  
402 of trial-by-trial behavior, i.e. trials on the left-hand side of the vertical colored line for each subject  
403 (Figure 3C). For the 25RotSuccess and 15Rot groups all trials during the learning period were  
404 analyzed. Crucially, there was no difference in the percentage of correct trials within this period  
405 between the groups ( $H(2) = 2.19, p = 0.33$ ).

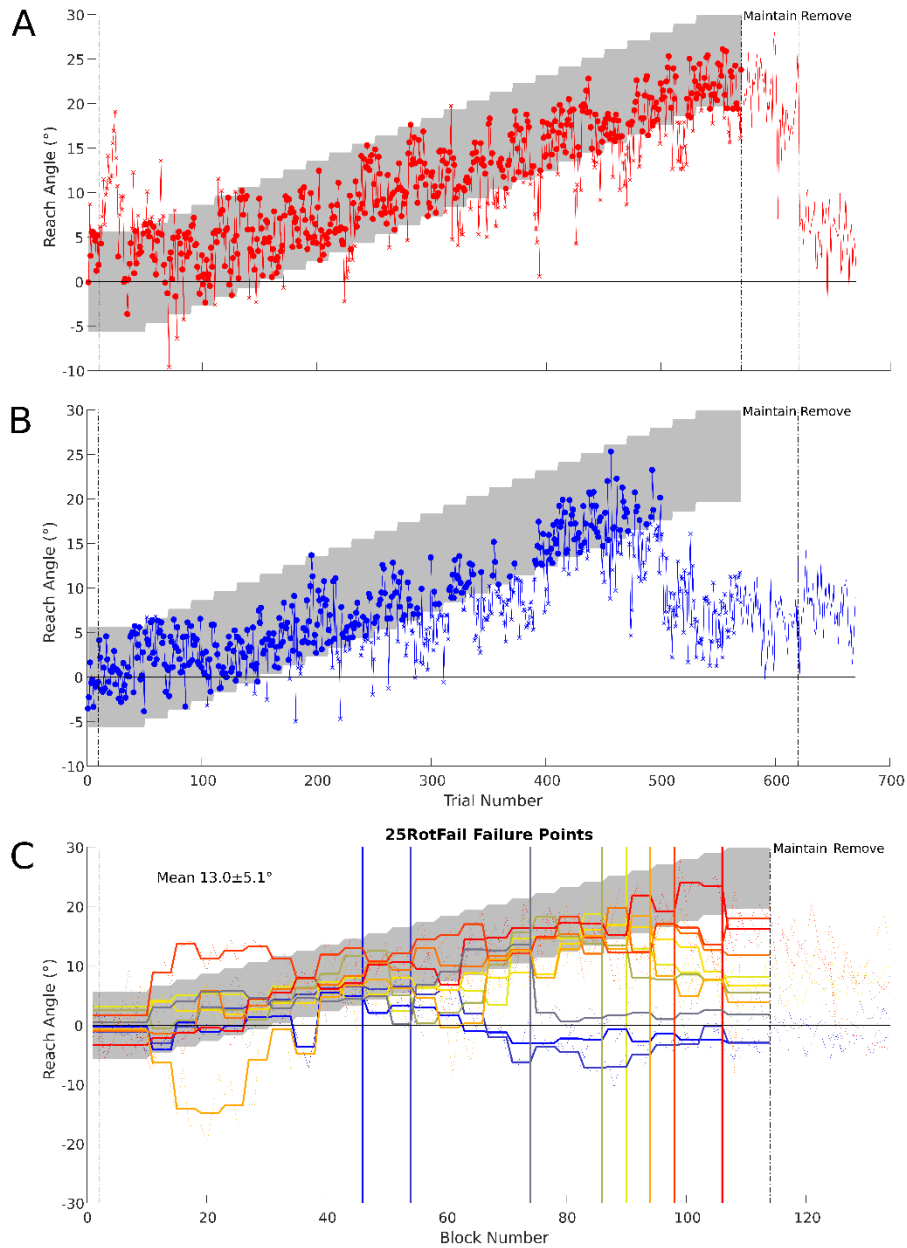

406

407 **Figure 3. Experiment 1: trial-by-trial behavior.** Example of trial by trial reach angles from a subject  
408 who was successful at the final angle (A) and one who was unsuccessful (B). In each case rewarded  
409 trials are indicated with a circular marker and non-rewarded trials with a 'x'. The grey shaded  
410 region indicates the reward region. C, Failure points for subjects in the 25RotFail group, thick lines  
411 are the mean reach angle for each subject at each rotation angle, thin lines represent mean of each  
412 block (average of 5 trials), colors go from hot to cold matching failure angles ranging from high to  
413 low. Vertical lines represent the last angle at which mean reach fell within rewarded region for each  
414 subject. The mean and standard deviation of all angles of failure is displayed as text.

415 Next, we examined if changes in reach angle were affected by the outcome of the previous trial. A  
416 similar analysis has been employed previously (Pekny et al., 2015). We examined the distributions of  
417  $\Delta u$  following only rewarded (Correct) or unrewarded (Wrong) trials. The resulting distributions of  $\Delta u$   
418 were non-normal and therefore we report the median and median absolute deviation from the median  
419 (MAD). Whilst the median  $\Delta u$  was greater following unrewarded trials ( $F(1,37) = 119.80$ ,  $p < 0.001$ ;  
420 Figure 4A), this effect was similar across groups ( $F(2,37) = 1.18$ ,  $p = 0.64$ ). Similarly, the MAD of  $\Delta u$   
421 was also greater following Wrong trials, indicating that not only did all groups make larger changes in  
422 reach angle but also that there was greater variability in these changes (Figure 4B). Despite a  
423 significant interaction with Group ( $F(2,37) = 5.32$ ,  $p = 0.019$ ), the trend for a higher MAD of  $\Delta u$   
424 following Wrong trials for the 25RotSuccess group (Figure 4B) did not reach significance after  
425 correction for multiple comparisons ( $H(2) = 5.63$ ,  $p = 0.06$ ). Subsequently we repeated the analysis  
426 but considered the absolute change in reach angle ( $|\Delta u|$ , Figure 4C, D). Here there was a significant  
427 interaction with Group for both median  $|\Delta u|$  ( $F(2,37) = 7.89$ ,  $p = 0.003$ ) and MAD of  $|\Delta u|$  ( $F(2,37) =$   
428  $7.39$ ,  $p = 0.004$ ) following Wrong trials. Post-hoc tests revealed that the 25RotSuccess group  
429 displayed a significantly greater median  $|\Delta u|$  ( $p = 0.024$ ) and MAD of  $|\Delta u|$  ( $p = 0.035$ ) than the  
430 25RotFail group. There was no difference between the groups in the magnitude or variability of the  
431 change in reach angle after correct trials. The analysis of the absolute changes in reach angle reveal  
432 that even during the period in which they are successful, the 25RotFail group made smaller and less  
433 variable changes following unrewarded trials.

434

435 In addition to the effect of the previous trial it is possible that subjects are sensitive to a history of  
436 outcomes spanning multiple previous trials (Pekny et al., 2015). In order to investigate the effects of  
437 reward history we examined the  $|\Delta u|$  following all possible combinations of success in the previous  
438 three trials (Figure 4E). We quantified this behavior using a state-space model in which  $|\Delta u|$  was a  
439 function of the outcome of the previous three trials. The components  $\alpha_0$ ,  $\alpha_1$  and  $\alpha_2$  represent the  
440 sensitivity to the outcome of the last three trials with  $\alpha_0$  being the most recent (Figure 4F),  $\epsilon$   
441 represents variability that could not be accounted for by the recent outcomes. There was an interaction

442 between component and group ( $F(3.49,64.51) = 4.49, p = 0.004$ ). All groups were most sensitive to  
443 the most recent trial outcome ( $\alpha_0$ ) with the 25RotSuccess group displaying significantly greater  
444 change than 25RotFail ( $p = 0.001$ ). There was no difference between groups for other components  
445 indicating that differences in behavior were driven by the sensitivity to the outcome of the most recent  
446 trial. From these results it becomes apparent that, even in the initial period of success, subjects who  
447 will go on to fail to learn the full rotation show a decreased sensitivity to errors.

448

449 There was no difference between groups for either movement time ( $H(2) = 4.95, p = 0.084$ ) or  
450 reaction time ( $H(2) = 2.98, p = 0.23$ ). Additionally, within the 25RotFail group reaction and  
451 movement times did not differ before and after the point of failure ( $Z = 25, p = 0.85$  and  $Z = 42, p =$   
452  $0.16$  respectively). In response to the questions asked to probe awareness we found no significant  
453 difference between the groups ( $\chi^2(2) = 3.75, p = 0.15$ ).

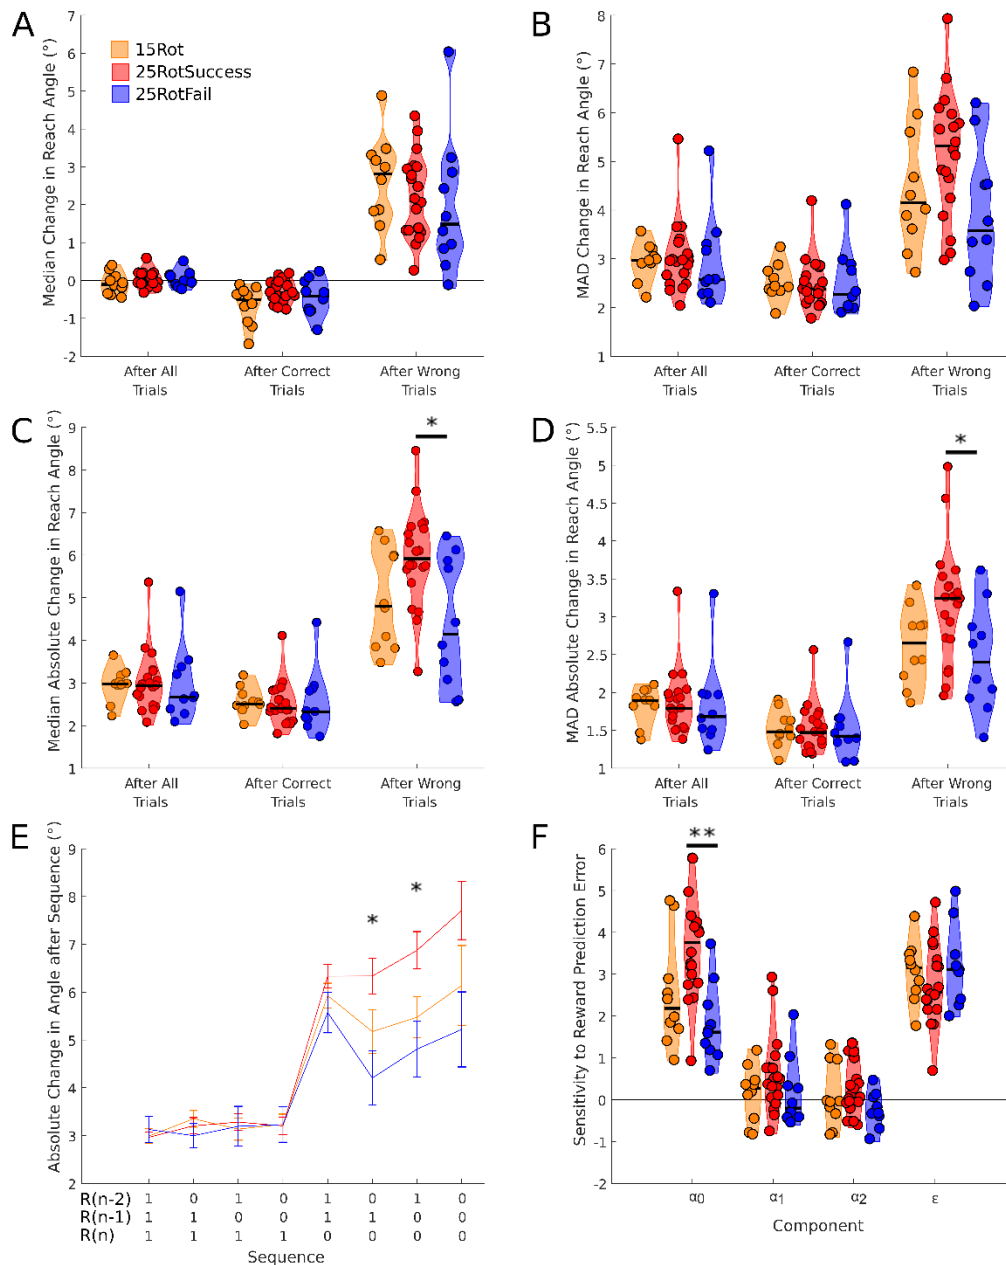

454

455 **Figure 4. Experiment 1: performance after correct and incorrect trials.** Analysis of the effects of the  
 456 success of the previous trial and reward history on trial by trial changes in reach angle for the three  
 457 groups in Experiment 1 (15Rot – Orange, 25RotSuccess – Red, 25RotFail – Blue). Median (A) and  
 458 MAD (B) of change in reach angle separated by the success of the previous trial. Median (C) and  
 459 MAD (D) of the absolute change in reach angle separated by the success of the previous trial. E, The  
 460 absolute change in reach angle following all combinations of trial success over the previous three  
 461 trials. F, Sensitivity to the outcomes of each of the previous trials. Significance stars above horizontal  
 462 black bars indicate differences between the groups (\*  $P < 0.05$ , \*\*  $P < 0.01$ ).

463 ***Experiment 2: Addition of a dual task prevents learning***

464

465 Following the finding of Experiment 1 that successful reinforcement-based motor learning involves  
466 the development of an explicit strategy, we sought to investigate if it was possible to disrupt learning  
467 by dividing cognitive load. To this end, we required subjects to hold a shape in memory during the  
468 period of movement (Figure 1D).

469

470 The DualTask (N=10) group displayed little learning and none successfully compensated for the  
471 maximum rotation (Green group, Figure 5A). As in Experiment 1, the Control (N=10) group on  
472 average fell short of complete learning (Purple group, Figure 5A, B), indicated by the mean reach  
473 direction falling outside the reward region in the final learning blocks. However, the average of the  
474 group obscures a similar split in behavior with only six subjects successfully learning the full rotation  
475 and four failing to do so, which we will label (ControlSuccess and ControlFail, respectively (Figure  
476 5B).

477

478 Examining performance in the same time periods as Experiment 1 (Figure 5C) revealed no difference  
479 between the three groups at baseline ( $H(2) = 0.38$ ,  $p = 0.83$ ). However, by the time the angle of  
480 rotation had increased to  $15^\circ$  a significant difference had already emerged ( $H(2) = 6.88$ ,  $p = 0.03$ ),  
481 with the DualTask group displaying lower reach angle than ControlSuccess ( $p = 0.011$ ).

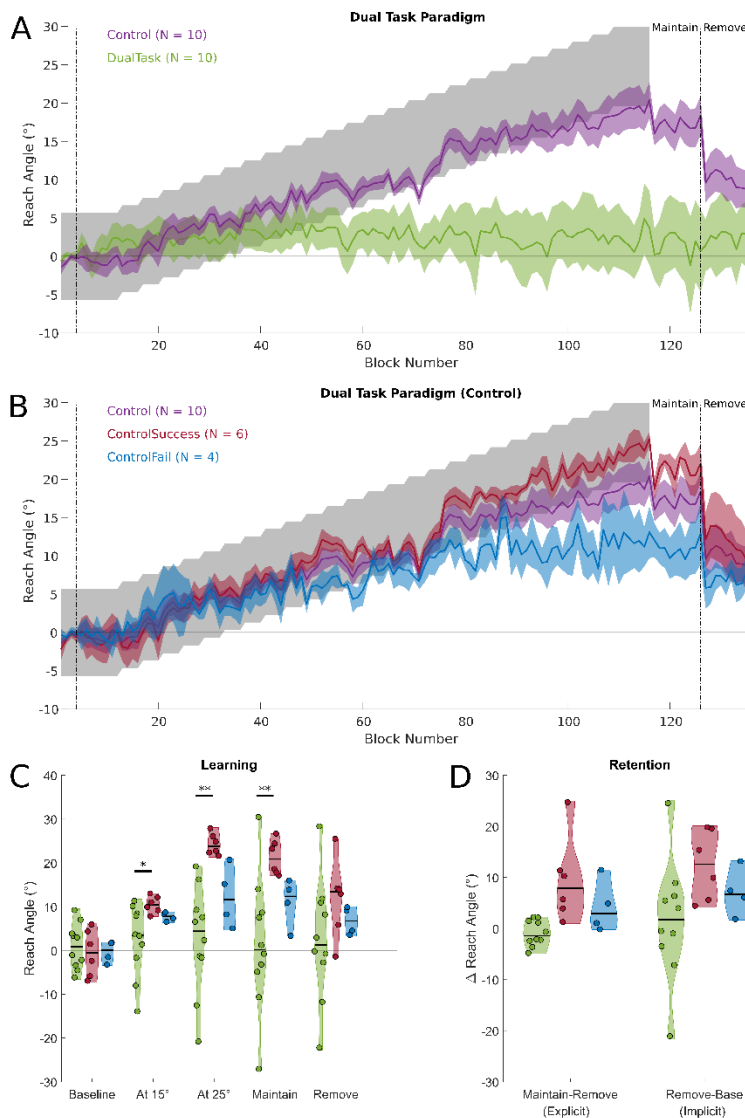

482

483 **Figure 5. Experiment 2: group performance.** Change in reach angle over blocks (average of 5 trials)  
 484 during the dual task experiment. **A**, Group performance for the DualTask (Green) and Control  
 485 (Purple) task groups, the line indicates the mean and shaded region the SEM. The grey shaded region  
 486 represents the reward region. **B**, the split of the control task group into ControlSuccess (Dark Red)  
 487 and ControlFail (Blue). **C**, Distribution plots displaying the performance at different time points for  
 488 the dual task, and split control groups. The shaded region represents an estimation of the distribution  
 489 and is overlaid with data for each individual subject. **D**, Distribution plots of the difference in reach  
 490 angle during retention phases indicating the implicit and explicit components of retention.  
 491 Significance stars above horizontal black bars indicate differences between the groups (\*  $P < 0.05$ ,  
 492 \*\*  $P < 0.01$ ).

493 As can be seen from the performance of individuals in the DualTask group (Figure 6), there were very  
494 few correct trials (mean angle of failure  $6.0^\circ$ ) rendering the analysis of trials within the successful  
495 period employed for Experiment 1 invalid. Despite this limitation for the DualTask group, the  
496 analysis could still elucidate differences between the ControlSuccess and ControlFail groups and  
497 reassuringly the mean angle of failure in ControlFail group is  $13^\circ$ , similar to experiment 1. However,  
498 the small group numbers preclude statistical comparison between the ControlSuccess and ControlFail  
499 groups but the pattern of behavior was visually similar to that in Experiment 1 (Figure 7). Overall the  
500 analysis of sensitivity to reward history produced remarkably similar results to Experiment 1 with the  
501 primary difference between those who learn and those who fail to do so being the sensitivity to the  
502 outcome of the most recent trial (Figure 7F).

503

504

505



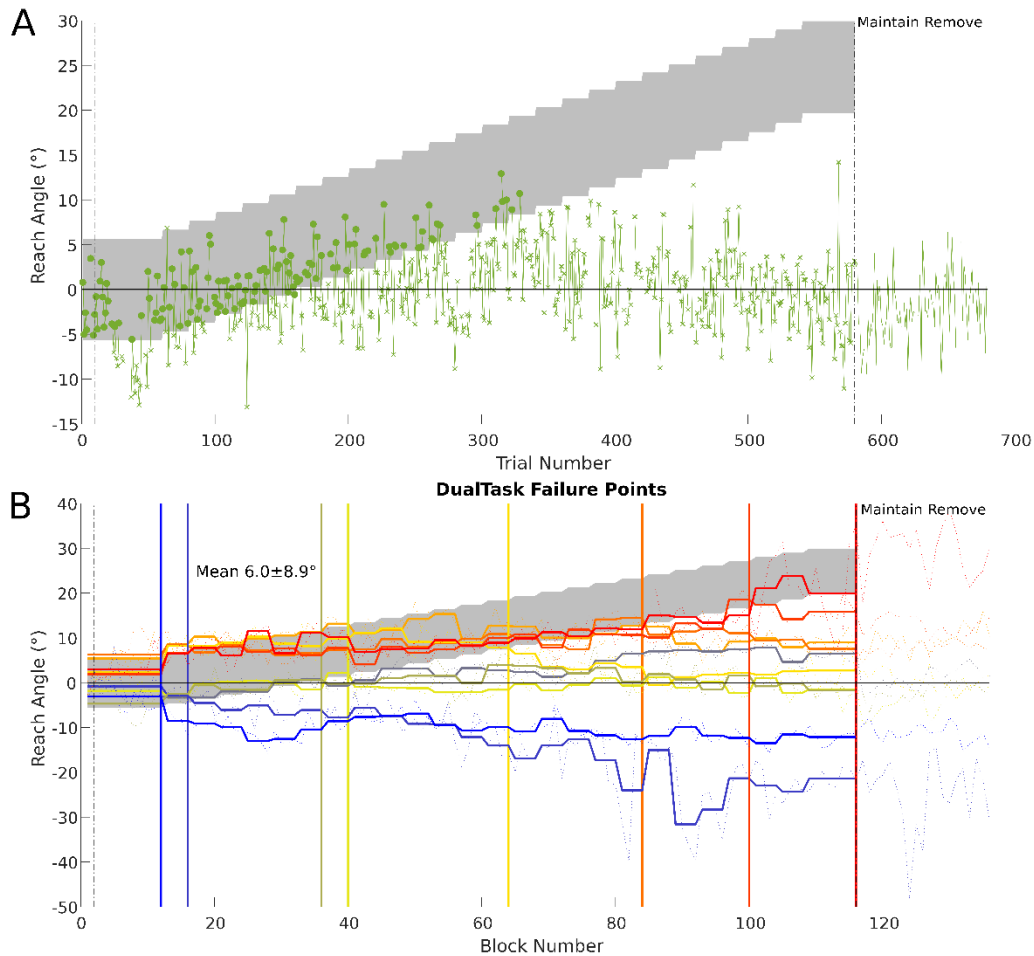

506  
507 **Figure 6. Experiment 2: trial-by-trial behavior.** Example of trial by trial reach angles from a subject  
508 performing the dual task (A) rewarded trials are indicated with a circular marker and non-rewarded  
509 trials with a 'x'. The grey shaded region represents the reward region. B, Failure points for subjects  
510 in the DualTask group, thick lines are the mean reach angle for each subject at each rotation angle,  
511 thin lines represent mean of each block, colors go from hot to cold matching failure angles ranging  
512 from high to low. Vertical lines represent the last angle at which mean reach fell within rewarded  
513 region for each subject. The mean and standard deviation of the angle of failure is reported as text in  
514 the figure.

515

516 Finally, the DualTask subjects successfully engaged in the task mental rotation task as evidenced by a  
517 significant difference in percentage of correct button presses ( $H(2) = 15.30, p < 0.001$ ), the DualTask  
518 group responded correctly ( $67.21 \pm 3.60\%$ ) more in comparison to the ControlSuccess ( $p = 0.014$ ) and  
519 the ControlFail ( $p = 0.002$ ) groups. Engagement in the DualTask increased reaction time when

520 compared to ControlSuccess ( $p = 0.008$ ). There was no effect of Group on movement time ( $H(2) =$   
 521  $0.64, p = 0.73$ ).

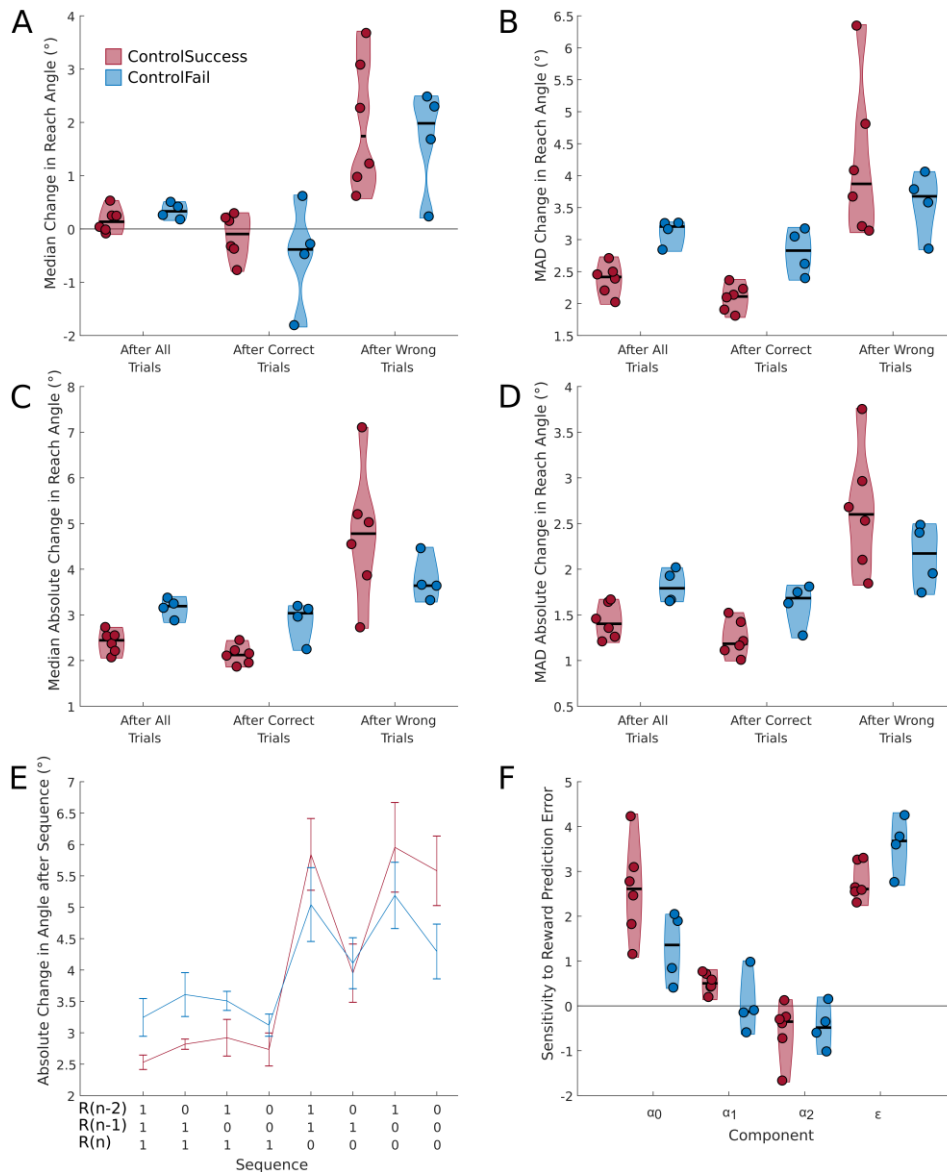

522

523 **Figure 7. Experiment 2: performance after correct and incorrect trials.** Analysis of the effects of the  
 524 success of the previous trial and reward history on trial by trial changes in reach angle for the two  
 525 groups performing the control task in Experiment 2. Distribution plots for median (A) and MAD (B)  
 526 of change in reach angle separated by the success of the previous trial. Median (C) and MAD (D) of  
 527 the absolute change in reach angle separated by the success of the previous trial. E, the absolute  
 528 change in reach angle following all combinations of trial success over the previous three trials. F,  
 529 sensitivity to the outcomes of each of the previous trials.

## 530 **Discussion**

531

532 The role of explicit strategies during reinforcement-based motor learning has previously been ill-  
533 defined. Here, we reveal that successfully learning to compensate for large, gradually introduced,  
534 rotations based on binary (reinforcement-based) feedback involves the development of an explicit  
535 strategy, and that not all subjects are able to do so. In both Experiment 1 and the Control group of  
536 Experiment 2 only two thirds of subjects were able to successfully learn a large perturbation, and  
537 those that did accomplished this principally via the use of a strategy. Analysis of the trial-by-trial  
538 behavior indicated that subjects adjusted their motor commands mainly in response to incorrect trials,  
539 and that they were most sensitive to errors made in the most recent trial. Subjects who would go on to  
540 fail to learn the full rotation exhibited reduced sensitivity to errors, even in the initial period in which  
541 they successfully followed the rotation. Further evidence for the explicit nature of the learning in this  
542 task was provided by Experiment 2, where increasing cognitive load via the addition of a dual task  
543 prevented learning.

544

545 Previous experiments investigating the learning of rotations based on binary feedback have employed  
546 relatively small angles (Izawa and Shadmehr, 2011; Pekny et al., 2015; Therrien et al., 2016), with the  
547 15° rotation used by Therrien et al. (2016) the largest reported to date. Indeed, when a rotation of 15°  
548 was used in Experiment 1 all subjects were successful in fully compensating for the visual rotation.  
549 Furthermore, there was no evidence for an explicit component to retention in the subjects who learnt  
550 the 15° rotation. In contrast, successful subjects in both experiments with a 25° rotation demonstrated  
551 a large explicit component to the learning, evidenced by a large reduction in the reach angle when  
552 asked to remove any strategy. It could therefore be speculated that multiple mechanisms might be  
553 available when learning from binary feedback, but that if the size of the perturbation exceeds a certain  
554 magnitude an explicit strategy is required to compensate for it. Previously it has been suggested that  
555 additional learning mechanisms are recruited in response to gradually introduced visuomotor rotations  
556 when only end-point feedback is available, (Izawa and Shadmehr, 2011; Saijo and Gomi, 2010).

557 Indeed Saijo and Gomi (2010) suggest, on the basis of an increase in reaction times, that explicit  
558 changes in motor planning occur in this paradigm. Furthermore, similarly to the results presented  
559 here, the authors also find that not all subjects are able to accomplish this. However, none of the  
560 previous studies investigating learning of rotations based on binary feedback (Izawa and Shadmehr,  
561 2011; Pekny et al., 2015; Therrien et al., 2016) have attempted to dissect the role of implicit and  
562 explicit processes. However, learning a rotation based on binary feedback was not accompanied by a  
563 change in perceived hand position, as was found when learning was based on full visual feedback of  
564 the cursor (Izawa and Shadmehr, 2011). This could be taken as evidence that the learning described  
565 by the authors was also explicit in nature in contrast to the implicit, cerebellar-driven, adaptation.

566

567 There is increasing appreciation of the role of explicit strategies in traditional visuomotor adaptation  
568 paradigms, in which visibility of the cursor ensures that both direction and magnitude of the error are  
569 available (Bond and Taylor, 2015, 2017). The use of an ‘error-clamp’ technique has estimated the  
570 limit of implicit adaptation based on sensory prediction errors to be at around 15° (Morehead et al.,  
571 2017). Such an estimate is roughly in accordance with other estimates obtained either by the use of  
572 forcibly reduced movement preparation times (Haith et al., 2015; Leow et al., 2017), self-reporting of  
573 aiming directions (Bond and Taylor, 2015) or the difference between trials with and without strategy  
574 use (Werner et al., 2015). It is important to note in our data that all groups, with the exception of those  
575 performing the dual task, display a small amount of retention even after the removal of strategies  
576 suggesting that there is some implicit aspect to the learning. Presumably the implicit learning process  
577 triggered in the current study is distinct from the sensory prediction error driven process as here the  
578 error signal is binary in nature and provides no information about direction or magnitude of error.  
579 However, it is interesting that both implicit processes appear to be unable to compensate for rotations  
580 greater than 15-20°, with explicit strategies required for greater angles. Haith and Krakauer (2013)  
581 have proposed a theoretical framework in which model-based (strategic/explicit) and model-free  
582 (implicit) reinforcement learning processes contribute to motor learning. Our findings suggest that in  
583 the current paradigm both processes might be engaged but that the implicit process is limited in the  
584 size of rotation it can learn. It remains to be seen if this is a limitation of magnitude, as with learning

585 from sensory prediction errors, or a limitation of speed. In other words, if the rotation was introduced  
586 more gradually or held constant for a longer period, could this implicit process account for all  
587 learning?

588

589 We measured the explicit contribution to learning via the use of an include/exclude design similar to  
590 Werner et al. (2015), which probes the contribution at the end of learning. Other approaches such as  
591 asking subjects to verbally report the aiming direction (Taylor et al., 2014) have the advantage of  
592 probing the relative contributions of implicit and explicit processes throughout learning. However, it  
593 has been suggested that this method may increase the explicit component by priming subjects that re-  
594 aiming is beneficial (Leow et al., 2017; Taylor et al., 2014). Such priming may be particularly powerful  
595 in paradigms like the current one as it has been shown that explicit awareness of the dimensions over  
596 which to explore is required for motor learning based on binary feedback (Manley et al., 2014).  
597 Alternatively, forcing subjects to respond at reduced reaction times can also suppresses the strategic  
598 component of adapting to a rotation (Haith et al., 2015; Leow et al., 2017). However, Leow et al.  
599 (2017) report that even at extremely short reaction times re-aiming to a single target, as used here, is  
600 still possible. In future, approaches such as measuring eye movement (Rand and Rentsch, 2016) may  
601 be beneficial to measure the explicit component during learning without priming subjects.

602

603 In order to investigate the mechanism through which subjects learnt to counter the rotation we  
604 employed the same analysis as Pekny et al., (2015). However, their study didn't involve learning as  
605 such, as the rotation was immediately washed out. Despite this, our results are remarkably similar, in  
606 that subjects in both studies made larger and more variable changes in actions following trials in  
607 which they made an error. Sidarta et al. (2016) have also described a similar pattern of behavior when  
608 subjects attempt to find a hidden target zone based on binary feedback, with greater reductions in  
609 error following incorrect trials. Our results indicate that subjects who were unable to learn the full  
610 rotation made smaller and less variable changes in response to errors and this was primarily driven by  
611 their sensitivity to the outcome of the previous trial. Learning from errors has been suggested to be a  
612 signature of explicit reinforcement learning, in contrast to learning from success in implicit learning

613 (Loonis et al., 2017). The finding that the difference between successful and unsuccessful subjects in  
614 the current experiments was in response to errors further supports the idea that it is the sensitivity of  
615 the explicit system that is important for this task. Interestingly, the pattern of reduced sensitivity to  
616 errors found for unsuccessful subjects in the current experiment was similar to that described for  
617 parkinsonian patients (Pekny et al., 2015). Genetic variability in various aspects of the dopaminergic  
618 system has previously been linked to differential performance in reinforcement learning (Frank et al.,  
619 2007, 2009) and the balance of model-free and model-based decision-making systems (Doll et al.,  
620 2016). Future experiments assessing if the same genetic principles apply to motor learning based on  
621 reward may be useful in not only explaining the variation in response but also cementing the links  
622 between the principles of reinforcement learning and motor learning. Interestingly, the magnitude of  
623 changes made in response to errors in a binary feedback based motor learning task was correlated  
624 with connectivity changes between motor areas, prefrontal cortex and the intraparietal sulcus (Sidarta  
625 et al., 2016). The prefrontal cortex and intraparietal sulcus have been associated with the model-based  
626 decision making system (Gläscher et al., 2010), adding further evidence for a pivotal role of explicit  
627 systems in reward-based motor learning. However, it should be noted that effects of attention and  
628 motivation cannot be ruled out in the current paradigm. Therefore, accompanying neurophysiological  
629 measures of these variables may be useful in elucidating their possible contribution.

630

631 The efficacy of the dual task paradigm employed here in preventing learning is remarkable. Dual  
632 tasks have previously been employed in conjunction with motor adaptation to visuomotor rotations  
633 (Galea et al., 2010), force-fields (Keisler and Shadmehr, 2010; Taylor and Thoroughman, 2007,  
634 2008), as well as during the learning of motor skills (Maxwell et al., 2001) and sequence learning  
635 (Brown and Robertson, 2007). Galea et al. (2010) demonstrated that a secondary task can slow the  
636 rate of adaptation to both a gradually and abruptly introduced visuomotor rotation. Keisler and  
637 Shadmehr (2010) found that a declarative memory task could interfere with the ‘fast’ adaptation  
638 system but that a demanding cognitive task without the memory component did not. Furthermore,  
639 inhibition of the ‘fast’ process led to an increase in the ‘slow’, non-declarative process. Similarly in a  
640 sequence learning task a dual task with a declarative element increased the procedural learning

641 suggesting that these two aspects of learning may be in competition (Brown and Robertson, 2007). It  
642 could therefore be hypothesized that the use of a dual task in the current paradigm would shift  
643 learning from explicit to the implicit system. However, the current data suggest that this did not occur  
644 and for this paradigm the explicit system is necessary to compensate for large rotations, and cannot be  
645 substituted for by an increase in the use of the implicit learning system. Whereas previous  
646 experiments have employed secondary tasks that involve more verbal systems (Galea et al., 2010;  
647 Keisler and Shadmehr, 2010; Taylor and Thoroughman, 2007), we selected the dual task which would  
648 have the maximum likelihood of disrupting the explicit system (Anguera et al., 2009; Georgopoulos  
649 and Massey, 1987). As the difficulty of the secondary task has been linked with the amount of  
650 disruption (Taylor and Thoroughman, 2008), it is also possible that the specific nature of the task may  
651 also be important and this is an interesting area for future study. One other possibility is that constant  
652 impairment of performance due to the secondary task may reduce intrinsic motivation of subjects  
653 (Liao and Masters, 2001).

654

655 The distinction between implicit and explicit reinforcement systems engaging in learning motor tasks  
656 is not merely academic. At least part of the increased interest in the addition of reward to motor  
657 adaptation and learning is due to the finding that it increases retention (Abe et al., 2011; Dayan et al.,  
658 2014, 2014; Galea et al., 2015; Shmuelof et al., 2012; Therrien et al., 2016), along with the promise  
659 this may have in a rehabilitation setting (Quattrocchi et al., 2017). However, if the benefits are  
660 primarily due to explicit or strategic processes, they may be poorly transferred to other environments  
661 and be susceptible to disruption. In line with this, it has been demonstrated that motor skills, such as  
662 golf putting or playing table tennis, are less disrupted by manipulations such as dividing cognitive  
663 load, reducing reaction times or performing in stressful situations when learnt implicitly (Liao and  
664 Masters, 2001; Maxwell et al., 2001). If the final goal of the addition of reward to motor learning  
665 tasks is to increase retention for practical rehabilitation then it may be that methods that increase the  
666 implicit contribution are required such as employing learning by analogy, reducing errors during  
667 learning or the addition of dual tasks (Liao and Masters, 2001). However, the choice and difficulty of

668 the dual task should be made with caution as from the data presented here it may be too disruptive and  
669 ultimately prevent learning.

670

## 671 **Acknowledgements**

672 The authors would like to thank Dr. Xiuli Chen for advice concerning the analysis of the data.

673

## 674 **Grants**

675 PH, OC, and JM were supported by the European Research Council grant MotMotLearn 637488.

## 676 **Disclosures**

677 The authors declare no competing financial interests.

678

## 679 **References**

680 Abe, M., Schambra, H., Wassermann, E.M., Luckenbaugh, D., Schweighofer, N., and Cohen, L.G.  
681 (2011). Reward Improves Long-Term Retention of a Motor Memory through Induction of Offline  
682 Memory Gains. *Curr. Biol.* *21*, 557–562.

683 Anguera, J.A., Reuter-Lorenz, P.A., Willingham, D.T., and Seidler, R.D. (2009). Contributions of Spatial  
684 Working Memory to Visuomotor Learning. *J. Cogn. Neurosci.* *22*, 1917–1930.

685 Bond, K.M., and Taylor, J.A. (2015). Flexible explicit but rigid implicit learning in a visuomotor  
686 adaptation task. *J. Neurophysiol.* *113*, 3836–3849.

687 Bond, K.M., and Taylor, J.A. (2017). Structural Learning in a Visuomotor Adaptation Task Is Explicitly  
688 Accessible. *eNeuro* *4*.

689 Brown, R.M., and Robertson, E.M. (2007). Inducing motor skill improvements with a declarative task.  
690 *Nat. Neurosci.* *10*, nn1836.

691 Christou, A.I., Miall, R.C., McNab, F., and Galea, J.M. (2016). Individual differences in explicit and  
692 implicit visuomotor learning and working memory capacity. *Sci. Rep.* *6*.

693 Dayan, E., Averbeck, B.B., Richmond, B.J., and Cohen, L.G. (2014). Stochastic reinforcement benefits  
694 skill acquisition. *Learn. Mem.* *21*, 140–142.

695 Doll, B.B., Bath, K.G., Daw, N.D., and Frank, M.J. (2016). Variability in Dopamine Genes Dissociates  
696 Model-Based and Model-Free Reinforcement Learning. *J. Neurosci.* *36*, 1211–1222.



- 697 Frank, M.J., Moustafa, A.A., Haughey, H.M., Curran, T., and Hutchison, K.E. (2007). Genetic triple  
698 dissociation reveals multiple roles for dopamine in reinforcement learning. *Proc. Natl. Acad. Sci. U. S.*  
699 *A. 104*, 16311–16316.
- 700 Frank, M.J., Doll, B.B., Oas-Terpstra, J., and Moreno, F. (2009). The neurogenetics of exploration and  
701 exploitation: Prefrontal and striatal dopaminergic components. *Nat. Neurosci. 12*, 1062–1068.
- 702 Galea, J.M., Sami, S.A., Albert, N.B., and Miall, R.C. (2010). Secondary tasks impair adaptation to  
703 step- and gradual-visual displacements. *Exp. Brain Res. 202*, 473–484.
- 704 Galea, J.M., Mallia, E., Rothwell, J., and Diedrichsen, J. (2015). The dissociable effects of punishment  
705 and reward on motor learning. *Nat. Neurosci. 18*, 597–602.
- 706 Georgopoulos, A.P., and Massey, J.T. (1987). Cognitive spatial-motor processes. *Exp. Brain Res. 65*,  
707 361–370.
- 708 Gläscher, J., Daw, N., Dayan, P., and O’Doherty, J.P. (2010). States versus Rewards: Dissociable  
709 Neural Prediction Error Signals Underlying Model-Based and Model-Free Reinforcement Learning.  
710 *Neuron 66*, 585–595.
- 711 Haith, A.M., and Krakauer, J.W. (2013). Model-Based and Model-Free Mechanisms of Human Motor  
712 Learning. *Adv. Exp. Med. Biol. 782*, 1–21.
- 713 Haith, A.M., Huberdeau, D.M., and Krakauer, J.W. (2015). The Influence of Movement Preparation  
714 Time on the Expression of Visuomotor Learning and Savings. *J. Neurosci. 35*, 5109–5117.
- 715 Huang, J.-J., Yen, C.-T., Tsao, H.-W., Tsai, M.-L., and Huang, C. (2014). Neuronal Oscillations in Golgi  
716 Cells and Purkinje Cells are Accompanied by Decreases in Shannon Information Entropy. *The*  
717 *Cerebellum 13*, 97–108.
- 718 Huberdeau, D.M., Krakauer, J.W., and Haith, A.M. (2015). Dual-process decomposition in human  
719 sensorimotor adaptation. *Curr. Opin. Neurobiol. 33*, 71–77.
- 720 Izawa, J., and Shadmehr, R. (2011). Learning from Sensory and Reward Prediction Errors during  
721 Motor Adaptation. *PLOS Comput Biol 7*, e1002012.
- 722 Izawa, J., Criscimagna-Hemminger, S.E., and Shadmehr, R. (2012). Cerebellar Contributions to Reach  
723 Adaptation and Learning Sensory Consequences of Action. *J. Neurosci. 32*, 4230–4239.
- 724 Keisler, A., and Shadmehr, R. (2010). A Shared Resource between Declarative Memory and Motor  
725 Memory. *J. Neurosci. 30*, 14817–14823.
- 726 van der Kooij, K., and Overvliet, K.E. (2016). Rewarding imperfect motor performance reduces  
727 adaptive changes. *Exp. Brain Res. 234*, 1441–1450.
- 728 Leow, L.-A., Gunn, R., Marinovic, W., and Carroll, T.J. (2017). Estimating the implicit component of  
729 visuomotor rotation learning by constraining movement preparation time. *J. Neurophysiol.*  
730 *jn.00834.2016*.

- 731 Liao, C.-M., and Masters, R.S.W. (2001). Analogy learning: A means to implicit motor learning. *J.*  
732 *Sports Sci.* *19*, 307–319.
- 733 Loonis, R.F., Brincat, S.L., Antzoulatos, E.G., and Miller, E.K. (2017). A Meta-Analysis Suggests  
734 Different Neural Correlates for Implicit and Explicit Learning. *Neuron* *96*, 521–534.e7.
- 735 Manley, H., Dayan, P., and Diedrichsen, J. (2014). When Money Is Not Enough: Awareness, Success,  
736 and Variability in Motor Learning. *PLOS ONE* *9*, e86580.
- 737 Maxwell, J.P., Masters, R.S.W., Kerr, E., and Weedon, E. (2001). The implicit benefit of learning  
738 without errors. *Q. J. Exp. Psychol. Sect. A* *54*, 1049–1068.
- 739 McDougle, S.D., Bond, K.M., and Taylor, J.A. (2015). Explicit and Implicit Processes Constitute the  
740 Fast and Slow Processes of Sensorimotor Learning. *J. Neurosci.* *35*, 9568–9579.
- 741 Morehead, J.R., Taylor, J.A., Parvin, D.E., and Ivry, R.B. (2017). Characteristics of Implicit  
742 Sensorimotor Adaptation Revealed by Task-irrelevant Clamped Feedback. *J. Cogn. Neurosci.* *29*,  
743 1061–1074.
- 744 Nikooyan, A.A., and Ahmed, A.A. (2015). Reward feedback accelerates motor learning. *J.*  
745 *Neurophysiol.* *113*, 633–646.
- 746 Pekny, S.E., Izawa, J., and Shadmehr, R. (2015). Reward-Dependent Modulation of Movement  
747 Variability. *J. Neurosci.* *35*, 4015–4024.
- 748 Peters, M., and Battista, C. (2008). Applications of mental rotation figures of the Shepard and  
749 Metzler type and description of a mental rotation stimulus library. *Brain Cogn.* *66*, 260–264.
- 750 Quattrocchi, G., Greenwood, R., Rothwell, J.C., Galea, J.M., and Bestmann, S. (2017). Reward and  
751 punishment enhance motor adaptation in stroke. *bioRxiv* 106377.
- 752 Rand, M.K., and Rentsch, S. (2016). Eye-Hand Coordination during Visuomotor Adaptation with  
753 Different Rotation Angles: Effects of Terminal Visual Feedback. *PLOS ONE* *11*, e0164602.
- 754 Saijo, N., and Gomi, H. (2010). Multiple Motor Learning Strategies in Visuomotor Rotation. *PLOS ONE*  
755 *5*, e9399.
- 756 Shepard, R.N., and Metzler, J. (1971). Mental Rotation of Three-Dimensional Objects. *Science* *171*,  
757 701–703.
- 758 Shmuelof, L., Huang, V.S., Haith, A.M., Delnicki, R.J., Mazzoni, P., and Krakauer, J.W. (2012).  
759 Overcoming Motor “Forgetting” Through Reinforcement Of Learned Actions. *J. Neurosci.* *32*, 14617–  
760 14621.
- 761 Sidarta, A., Vahdat, S., Bernardi, N.F., and Ostry, D.J. (2016). Somatic and Reinforcement-Based  
762 Plasticity in the Initial Stages of Human Motor Learning. *J. Neurosci.* *36*, 11682–11692.
- 763 Smith, M.A., Ghazizadeh, A., and Shadmehr, R. (2006). Interacting Adaptive Processes with Different  
764 Timescales Underlie Short-Term Motor Learning. *PLOS Biol.* *4*, e179.

- 765 Taylor, J.A., and Thoroughman, K.A. (2007). Divided Attention Impairs Human Motor Adaptation But  
766 Not Feedback Control. *J. Neurophysiol.* *98*, 317–326.
- 767 Taylor, J.A., and Thoroughman, K.A. (2008). Motor Adaptation Scaled by the Difficulty of a Secondary  
768 Cognitive Task. *PLoS ONE* *3*.
- 769 Taylor, J.A., Krakauer, J.W., and Ivry, R.B. (2014). Explicit and Implicit Contributions to Learning in a  
770 Sensorimotor Adaptation Task. *J. Neurosci.* *34*, 3023–3032.
- 771 Therrien, A.S., Wolpert, D.M., and Bastian, A.J. (2016). Effective reinforcement learning following  
772 cerebellar damage requires a balance between exploration and motor noise. *Brain* *139*, 101–114.
- 773 Tseng, Y., Diedrichsen, J., Krakauer, J.W., Shadmehr, R., and Bastian, A.J. (2007). Sensory Prediction  
774 Errors Drive Cerebellum-Dependent Adaptation of Reaching. *J. Neurophysiol.* *98*, 54–62.
- 775 Werner, S., Aken, B.C. van, Hulst, T., Frens, M.A., Geest, J.N. van der, Strüder, H.K., and Donchin, O.  
776 (2015). Awareness of Sensorimotor Adaptation to Visual Rotations of Different Size. *PLOS ONE* *10*,  
777 e0123321.
- 778
- 779
- 780
